# Supplementary material for: Contrasting the group 6 metal–metal bonding in sodium dichromate(ii) and sodium dimolybdate(ii) polymethyl complexes: synthetic, X-ray crystallographic and theoretical studies
Source: Royal Society of Chemistry journal article supplement (doi:10.1039/c6dt04644d), 2017-01-01
Supplement: c6dt04644d1.pdf [file c6dt04644d1.pdf]

**Contrasting the Group 6 metal-metal bonding in sodium dichromate(II) and sodium dimolybdate(II) polymethyl complexes: Synthetic, X-ray Crystallographic and Theoretical Studies**

Ross Campbell,<sup>a</sup> Alan R. Kennedy,<sup>a</sup> Ross McLellan,<sup>a</sup> Stuart D. Robertson,<sup>a</sup> Stephen Sproules<sup>b</sup>  
and Robert E. Mulvey\*<sup>a</sup>

<sup>a</sup> WestCHEM, Department of Pure and Applied Chemistry, University of Strathclyde,  
Glasgow, G1 1XL, UK.

<sup>b</sup> WestCHEM, School of Chemistry, University of Glasgow, Glasgow, G12 8QQ, UK.

Email: [r.e.mulvey@strath.ac.uk](mailto:r.e.mulvey@strath.ac.uk)

**SUPPORTING INFORMATION**

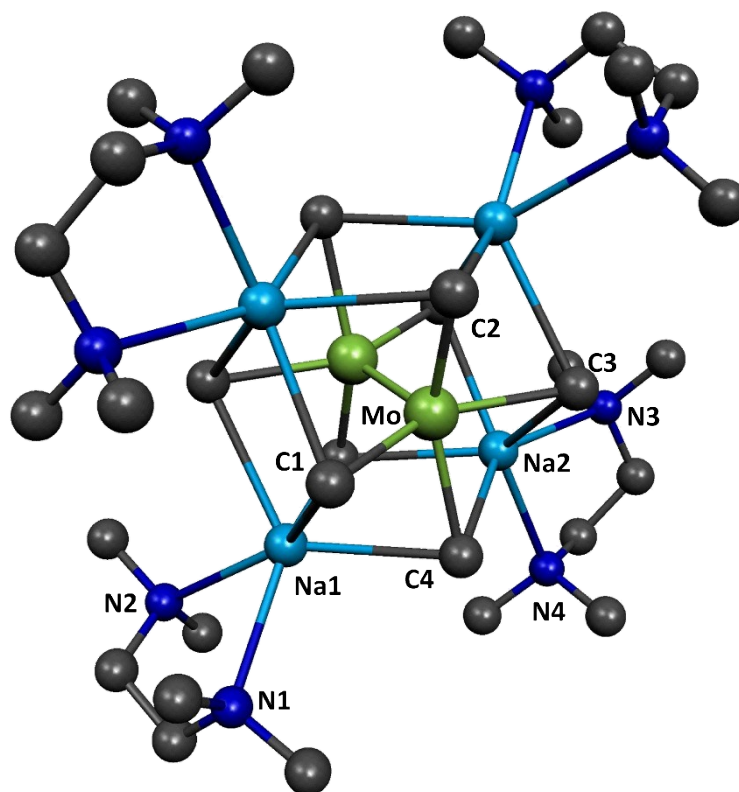

**Figure S1.** Geometry optimised structure of **5** (hydrogen atoms removed for clarity).

**Table S1.** Calculated and Experimental Bond Distances (Å) for **5**

|                                     | Exptl     | Calcd |
|-------------------------------------|-----------|-------|
| Mo(1)–Mo(1')                        | 2.1403(3) | 2.137 |
| Mo(1)–C(1)                          | 2.318(2)  | 2.309 |
| Mo(1)–C(2)                          | 2.305(2)  | 2.306 |
| Mo(1)–C(3)                          | 2.318(2)  | 2.308 |
| Mo(1)–C(4)                          | 2.324(2)  | 2.316 |
| C(1)–Na(1)                          | 2.748(2)  | 2.740 |
| C(2)–Na(1)                          | 2.730(2)  | 2.668 |
| C(3)–Na(1)                          | 2.671(2)  | 2.675 |
| C(4)–Na(1)                          | 2.762(2)  | 2.734 |
| C(1)–Na(2)                          | 2.731(2)  | 2.640 |
| C(2)–Na(2)                          | 2.721(2)  | 2.688 |
| C(3)–Na(2)                          | 2.775(2)  | 2.751 |
| C(4)–Na(2)                          | 2.756(2)  | 2.823 |
| Na(1)–N(1)                          | 2.614(2)  | 2.553 |
| Na(1)–N(2)                          | 2.613(2)  | 2.564 |
| Na(2)–N(3)                          | 2.609(2)  | 2.582 |
| Na(2)–N(4)                          | 2.605(2)  | 2.573 |
| Mo(1)···C <sub>4</sub> <sup>a</sup> | 0.69      | 0.70  |

<sup>a</sup> Distance Mo is displaced from C<sub>4</sub> plane.

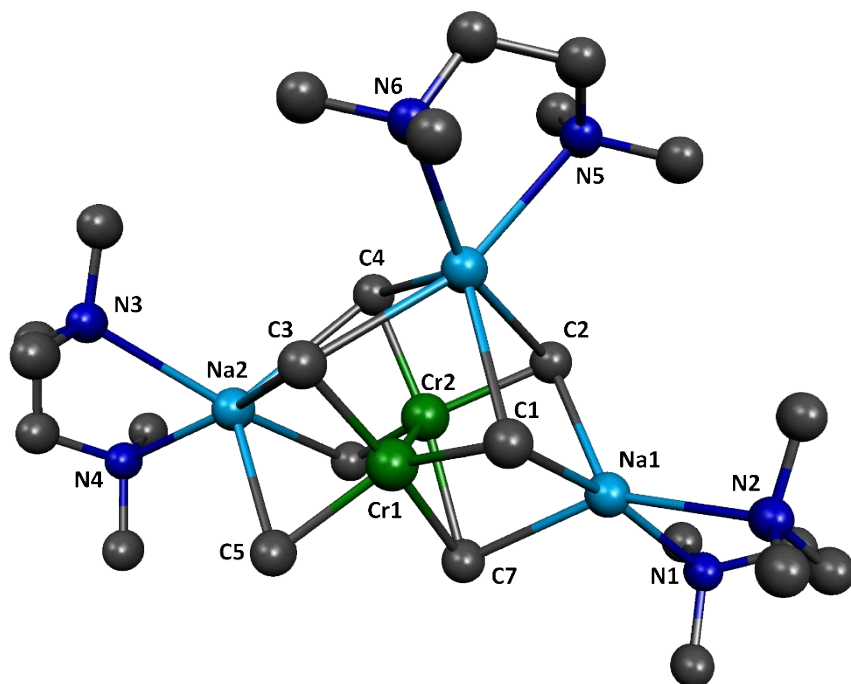

**Figure S2.** Geometry optimised structure of **6** (hydrogen atoms removed for clarity).

**Table S2.** Calculated and Experimental Bond Distances (Å) and Angles for **6**

|                  | Exptl <sup>a</sup>    | Calcd              |
|------------------|-----------------------|--------------------|
| Cr(1)–Cr(2)      | 1.9136(4)             | 1.858              |
| Cr(1)–C(1)       | 2.205(2)              | 2.205              |
| Cr(1)–C(3)       | 2.160(2)              | 2.161              |
| Cr(1)–C(5)       | 2.160(2)              | 2.140              |
| Cr(1)–C(7)       | 2.302(2)              | 2.279              |
| Cr(2)–C(2)       | 2.174(2)              | 2.188              |
| Cr(2)–C(4)       | 2.185(2)              | 2.160              |
| Cr(2)–C(6)       | 2.142(2)              | 2.117              |
| Cr(2)–C(7)       | 2.286(2)              | 2.398              |
| C(1)–Na(1)       | 2.544(2)              | 2.509              |
| C(2)–Na(1)       | 2.634(2)              | 2.492              |
| C(7)–Na(1)       | 2.625(2)              | 2.483              |
| C(3)–Na(2)       | 2.814(2)              | 2.841              |
| C(4)–Na(2)       | 2.993(2)              | 2.946              |
| C(5)–Na(2)       | 2.631(3)              | 2.520              |
| C(6)–Na(2)       | 2.786(3)              | 2.588              |
| C(1)–Na(3)       | 2.851(3)              | 2.735              |
| C(2)–Na(3)       | 2.899(2)              | 2.818              |
| C(3)–Na(3)       | 2.759(2)              | 2.711              |
| C(4)–Na(3)       | 2.769(2)              | 2.705              |
| Na(1)–N(1)       | 2.512(2)              | 2.490              |
| Na(1)–N(2)       | 2.544(2)              | 2.531              |
| Na(2)–N(3)       | 2.558(2)              | 2.534              |
| Na(2)–N(4)       | 2.663(2)              | 2.541              |
| Na(3)–N(5)       | 2.609(2)              | 2.632              |
| Na(3)–N(6)       | 2.607(2)              | 2.561              |
| Cr(1)–C(7)–Cr(2) | 49.30(5) <sup>o</sup> | 46.72 <sup>o</sup> |

<sup>a</sup> Calculated data are compared with the more highly resolved structure **7**.

**Table S3.** Crystallographic data and refinement details for complexes **5**, **6** and **7**.

|                                             | <b>5</b>                                                                       | <b>6</b>                                                                       | <b>7</b>                                                                       |
|---------------------------------------------|--------------------------------------------------------------------------------|--------------------------------------------------------------------------------|--------------------------------------------------------------------------------|
| Empirical formula                           | C <sub>32</sub> H <sub>88</sub> Mo <sub>2</sub> N <sub>8</sub> Na <sub>4</sub> | C <sub>25</sub> H <sub>69</sub> Cr <sub>2</sub> N <sub>6</sub> Na <sub>3</sub> | C <sub>37</sub> H <sub>87</sub> Cr <sub>2</sub> N <sub>6</sub> Na <sub>3</sub> |
| Mol. Mass                                   | 868.94                                                                         | 626.83                                                                         | 789.10                                                                         |
| Crystal system                              | monoclinic                                                                     | orthorhombic                                                                   | monoclinic                                                                     |
| Space group                                 | P 2 <sub>1</sub> /n                                                            | P 2 <sub>1</sub> 2 <sub>1</sub> 2 <sub>1</sub>                                 | P 2 <sub>1</sub>                                                               |
| a/ Å                                        | 11.3776(2)                                                                     | 13.5520(7)                                                                     | 12.0585(3)                                                                     |
| b/ Å                                        | 17.0310(4)                                                                     | 14.8524(6)                                                                     | 15.7116(5)                                                                     |
| c/ Å                                        | 12.7810(3)                                                                     | 18.5398(8)                                                                     | 12.5776(4)                                                                     |
| α                                           | 90                                                                             | 90                                                                             | 90                                                                             |
| β                                           | 105.031(2)                                                                     | 90                                                                             | 103.980(3)                                                                     |
| γ                                           | 90                                                                             | 90                                                                             | 90                                                                             |
| V/ Å <sup>3</sup>                           | 2391.86(9)                                                                     | 3731.7(3)                                                                      | 2312.35(12)                                                                    |
| Z                                           | 2                                                                              | 4                                                                              | 2                                                                              |
| λ/ Å                                        | 0.71073                                                                        | 0.71073                                                                        | 0.71073                                                                        |
| Measured reflections                        | 15939                                                                          | 22619                                                                          | 14038                                                                          |
| Unique reflections                          | 5647                                                                           | 9490                                                                           | 8711                                                                           |
| R <sub>int</sub>                            | 0.0358                                                                         | 0.0504                                                                         | 0.0201                                                                         |
| Observed rflns [I>2σ(I)]                    | 4010                                                                           | 6618                                                                           | 8281                                                                           |
| Goof                                        | 0.851                                                                          | 1.037                                                                          | 1.020                                                                          |
| R [on F, obs rflns only]                    | 0.0275                                                                         | 0.0551                                                                         | 0.0282                                                                         |
| ωR [on F <sup>2</sup> , all data]           | 0.0461                                                                         | 0.0942                                                                         | 0.0667                                                                         |
| Largest diff. Peak/hole. e/ Å <sup>-3</sup> | 0.42/-0.27                                                                     | 0.34/-0.26                                                                     | 0.39/-0.19                                                                     |
| Flack parameter                             | -                                                                              | -0.009(12)                                                                     | -0.013(10)                                                                     |
